# Supplementary material for: High self-selection of Ukrainian refugees into Europe: Evidence from Kraków and Vienna
Source: PubMed Central journal article supplement (PMC10732457; doi:10.1371/journal.pone.0279783), 2023-12-20
Supplement: pone.0279783.s002.pdf [file pone.0279783.s002.pdf]

# UkrPL

## Ukrainian Arrivals in Poland

**A Rapid-Response Survey on  
Sociodemographic Characteristics, Needs and Resources**

### Questionnaire

This is a scientific survey whose purpose is to gain demographic information about Ukrainians who recently arrived in Poland. The project is conducted by independent academic researchers from the Cracow University of Economics. The participation in the survey is voluntary – you can resign from it at any time while filling the questionnaire!

Your answers will be treated strictly confidentially and anonymously. They are subject to data protection and statistical confidentiality. All results will be exclusively used for the purpose of the current survey.

Udział w badaniu nie ma wpływu na sytuację ankietowanego w Polsce, ani na jakość i zakres obsługi w Urzędzie Miasta Krakowa czy nabycie praw gwarantowanych ustawą z dnia 12 marca 2022 r. o pomocy obywatelom Ukrainy w związku z konfliktem zbrojnym na terytorium tego państwa.

This study is financed by the Cracow University of Economics and led by Dr. Elena Nahorniuk, Prof. UEK dr hab Konrad Pędziwiatr, Prof. UEK dr hab. Jan Brzozowski and Prof. UEK dr hab. Marcin Stonawski.

1

**What is your sex?** Female Male Other \_\_\_\_\_

2

**How old are you?**

\_\_\_\_\_ Years

3

**In which country were you born?** Ukraine Russia Other European country Non-European country

4

**What is your citizenship? Multiple answers are possible.** Ukraine Russia Other European country Non-European country

5

**Where in Ukraine have you lived most of your life?** Autonomous Republic of Crimea (before 2014) Cherkaska oblast Chernihivska oblast Chernivetska oblast Dnipropetrovska oblast Donetsk oblast Ivano-Frankivska oblast Kharkivska oblast Khersonska oblast Khmelnytska oblast Kirovohradska oblast Kyiv Kyivska oblast Luhanska oblast Lvivska oblast Mykolaivska oblast Odeska oblast Poltavska oblast Rivnenska oblast Sumska oblast Ternopilska oblast Vinnytska oblast Volynska oblast Zakarpatska oblast Zaporizka oblast Zhytomyrska oblast

6

**What type of residence did you live in before you came here?** Your own house A rented apartment Your family's house A shared apartment with others Your own apartment Other

7

**How long did it take you to arrive to Poland from the place of your residence in Ukraine?**

\_\_\_\_\_ Days

8

**What is your religion?** Christian Orthodox None (e.g. Atheist) Greek Catholic Other religion

9

**What is your highest level of educational attainment?** Less than secondary general education Secondary general education (Atestat Pro Povnu Zagal'nu Serednyu Osvitu) Vocational education Bachelor (Bakalavr) Master (Magistr) Doctor of Philosophy, Arts or Science

10

**How many years of education have you completed?**

\_\_\_\_\_ Years

---

**11 Which language(s) do you speak**

- Ukrainian       Russian       English       German  
 Polish       Hungarian       Romanian       French  
 Spanish       Portuguese       Other language(s)

---

**11a Which language(s) you mainly use in daily life \_\_\_\_\_**

---

**12 Did you ever actively participate in the labor market?**

- Yes      → [go to question 13](#)  
 No      → [go to question 18](#)

---

**13 What is your main occupation?**

 Please enter ISCO 2-digit code from the list on the final page.

\_\_\_\_\_

---

**14 Please enter the name/description of the occupation.**

\_\_\_\_\_

---

**15 In which economic branch have you been active or employed?**

 Please enter NACE code from the list on the final page.

\_\_\_\_\_

---

**16 Which best describes your work status before leaving Ukraine?**

- Employed  
 Self-employed  
 Working with/ for family member in a family business or a farm  
 Student, in education or training  
 Looking after home/family  
 Unemployed  
 Other

---

**17 How many hours did you usually work each week?**

- 1 to 9 hours       35 or more hours  
 10 to 19 hours       Seasonal work  
 20 to 34 hours       Hours vary considerably

---

**18 Do you plan to stay in Poland?**

- Yes      → [go to question 20](#)  
 Do not know      → [go to question 20](#)  
 No      → [go to question 19](#)

---

**19 Where do you plan to go? Multiple answers are possible.**

- Germany       Portugal  
 Italy       United Kingdom  
 Switzerland       Austria  
 Spain       Other European country  
 Sweden       Non-European country  
 Back to Ukraine

**20 What do you want to do in Poland? Multiple answers are possible.**

- Search for a job
- To continue school/studying
- Wait until the war is over and live on savings and social benefits
- Do not know
- Do other things – what \_\_\_\_\_

→ go to question 21  
→ go to question 22  
→ go to question 22  
→ go to question 22  
→ go to question 22

**21 How many hours do you want to work each week?**

- Less than 20 hours
- 20 to 30 hours
- 31 to 40 hours
- 41 or more hours

**22 What is your general assessment of your health?**

- Very good
- Good
- Neither good nor bad
- Bad
- Very bad

**23 Do you have any long-term (chronic) illness or health problems?**

- Yes
- No

**24 For the past six months at least, to what extent have you been limited because of a health problem in activities people usually do?**

- Very much
- To some extent
- Not at all

**25 In times of trouble, can you count on at least some of your family or friends?**

- Yes, very much
- Yes, to some extent
- No, not at all

**26 Are you regularly seeking support in (online) spiritual events or praying to God regularly?**

- Yes, very much
- Yes, to some extent
- No, not at all

**27 Are you regularly seeking support in (online) community organization (Facebook, Telegram groups for Ukrainian refugees)?**

- Yes, very much
- Yes, to some extent
- No, not at all

**28 Did you feel that you were welcome when you arrived in Poland?**

- Totally
- Mostly
- In some ways
- Hardly at all
- Not at all
- Do not know

**29 When did you arrive in Poland?**

\_\_\_\_\_ (Day/Month/Year)

**30 How did you come to Poland?**

- Directly
- Through Slovakia
- Through Hungary
- Through Romania
- Through Moldova
- Through another country

**31 Why did you decide to flee from the war to Poland? Multiple answers are possible.**

- By chance/ not planned/ just ended up here
- I have family here
- I have friends here
- I know people here related to my/my partner's work
- Because it is easier to find work here
- Because it is close to Ukraine and I want to go back immediately when the war ends

Other \_\_\_\_\_

**32** Which statements below may express your considerations about returning to Ukraine?

- I have nothing to return to in Ukraine
- I want to return as soon as the war ends
- I may return in case the war ends
- I may return even if the war continues
- I do not have an idea, I do not know

**33** What is your family status?

- Married → go to question 34
- Cohabitation with partner → go to question 34
- Widowed → go to question 36
- Divorced → go to question 36
- Single → go to question 36

**34** How old is your partner?

\_\_\_\_\_ Years

**35** Where does your partner currently live?

- He/she is with me
- Other country
- Ukraine
- Do not know

**36** How many children do you have?

- No children → go to question 43

\_\_\_\_\_ Children → go to question 37

**37-42** Can you specify some details about your children?

|                                                | <b>37</b> Child 1                                                                                                                                           | <b>38</b> Child 2                                                                                                                                           | <b>39</b> Child 3                                                                                                                                           |
|------------------------------------------------|-------------------------------------------------------------------------------------------------------------------------------------------------------------|-------------------------------------------------------------------------------------------------------------------------------------------------------------|-------------------------------------------------------------------------------------------------------------------------------------------------------------|
| <b>Age</b>                                     | <input type="checkbox"/> Less than 1 year<br>_____ Years                                                                                                    | <input type="checkbox"/> Less than 1 year<br>_____ Years                                                                                                    | <input type="checkbox"/> Less than 1 year<br>_____ Years                                                                                                    |
| <b>Sex</b>                                     | <input type="checkbox"/> Male<br><input type="checkbox"/> Female                                                                                            | <input type="checkbox"/> Male<br><input type="checkbox"/> Female                                                                                            | <input type="checkbox"/> Male<br><input type="checkbox"/> Female                                                                                            |
| <b>Where does he/she currently live?</b>       | <input type="checkbox"/> Here with me<br><input type="checkbox"/> Ukraine<br><input type="checkbox"/> Other country<br><input type="checkbox"/> Do not know | <input type="checkbox"/> Here with me<br><input type="checkbox"/> Ukraine<br><input type="checkbox"/> Other country<br><input type="checkbox"/> Do not know | <input type="checkbox"/> Here with me<br><input type="checkbox"/> Ukraine<br><input type="checkbox"/> Other country<br><input type="checkbox"/> Do not know |
| <b>How many years did he/she go to school?</b> | _____ Years                                                                                                                                                 | _____ Years                                                                                                                                                 | _____ Years                                                                                                                                                 |

|                                                | 40 Child 4                                                                                                                                                  | 41 Child 5                                                                                                                                                  | 42 Child 6                                                                                                                                                  |
|------------------------------------------------|-------------------------------------------------------------------------------------------------------------------------------------------------------------|-------------------------------------------------------------------------------------------------------------------------------------------------------------|-------------------------------------------------------------------------------------------------------------------------------------------------------------|
| <b>Age</b>                                     | <input type="checkbox"/> Less than 1 year<br>_____ Years                                                                                                    | <input type="checkbox"/> Less than 1 year<br>_____ Years                                                                                                    | <input type="checkbox"/> Less than 1 year<br>_____ Years                                                                                                    |
| <b>Sex</b>                                     | <input type="checkbox"/> Male<br><input type="checkbox"/> Female                                                                                            | <input type="checkbox"/> Male<br><input type="checkbox"/> Female                                                                                            | <input type="checkbox"/> Male<br><input type="checkbox"/> Female                                                                                            |
| <b>Where does he/she currently live?</b>       | <input type="checkbox"/> Here with me<br><input type="checkbox"/> Ukraine<br><input type="checkbox"/> Other country<br><input type="checkbox"/> Do not know | <input type="checkbox"/> Here with me<br><input type="checkbox"/> Ukraine<br><input type="checkbox"/> Other country<br><input type="checkbox"/> Do not know | <input type="checkbox"/> Here with me<br><input type="checkbox"/> Ukraine<br><input type="checkbox"/> Other country<br><input type="checkbox"/> Do not know |
| <b>How many years did he/she go to school?</b> | _____ Years                                                                                                                                                 | _____ Years                                                                                                                                                 | _____ Years                                                                                                                                                 |

- 43 **Do you currently expect a child?**  
 Yes  No  Prefer not to answer

- 44 **Did you arrive in Poland with other family members, friends or neighbors? Multiple answers are possible.**
- Mother  Father  Sister(s)  
 Mother in law  Father in law  Brother(s)  
 Cousin(s)  Nephew(s)/ niece(s)  Neighbor(s)  
 Friend(s)  Other acquaintances  Other person/s – who?  
 With my children \_\_\_\_\_

- 45 **In what type of accommodation do you currently live here in Poland?**
- Rented single room  
 Rented apartment  
 Rented house  
 Own apartment  
 Own house  
 Living in the house or apartment with Polish family  
 Living in the house or apartment of someone for which I don't have to pay  
 Temporary shelter exchanged among refugees  
 Collective Shelter  
 Other

- 46 **How do you feel in your neighbourhood in Poland?**  
 Safe  Somewhat safe  Somewhat unsafe  Unsafe

- 47 **If you do not feel safe, why? Multiple answers are possible.**
- Racism/discrimination  Problems with Polish locals  
 Theft  Some bad individuals  
 Place where I stay is unsafe  Poland is not safe  
 Threats of violence/verbal assault  Lack of proper shelter  
 Fear of closing the shelter or camp  Fear of other ethnic/religious groups  
 Other

48 **What do you think about a democratic political system as a way of governing Ukraine? Would you say it is a very good, fairly good, fairly bad or very bad way of governing?**

- Very good
- Fairly good
- Fairly bad
- Very bad

49 **How much confidence do you have in the European Union? Is it a great deal of confidence, quite a lot of confidence, not very much confidence or none at all?**

- A great deal
- Quite a lot
- Not very much
- None at all

50 **Do you feel safe in Poland as a NATO country?**

- Yes, very much so
- Rather yes
- Neither yes nor no
- Rather no
- Surely no

51 **Should NATO intervene in Ukraine?**

- Yes, immediately
- Yes but only when chemical weapons are used
- Yes but only when biological weapons are used
- Yes but only when tactical nuclear weapons are used
- NATO should stay away from direct involvement in the war

52 **What is the most important support you were offered in Poland? (multiple answers possible)?**

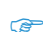

Serious problem (1), A minor problem (2), No problem (3), Not relevant (0)

**Support offered**

**Who offered support**

[choose from the list A below]

|                                                                                         |       |
|-----------------------------------------------------------------------------------------|-------|
| A shelter (a place to stay)                                                             | _____ |
| Means of subsistence (food/water, clothing etc)                                         | _____ |
| Logistic support to reach your destination<br>such as the camp, relatives, or elsewhere | _____ |
| Legal assistance about your status 5. Information<br>Information                        | _____ |
| Other (please briefly specify) _____                                                    | _____ |
| No support was offered                                                                  | _____ |
| No support was needed                                                                   | _____ |

**List A:**

1. Local individuals
2. Relatives or friends of yours
3. Police/soldiers/border guards
4. Public institutions
5. Local humanitarian organizations
6. International humanitarian
7. Religious institutions (churches)
8. Other

**53** Below you can find a list of issues related to the protection situation of refugees. For each one, please mark if it is a serious problem, a minor problem, or no problem at all for you and your family in Poland?

 Serious problem (1), A minor problem (2), No problem (3), Not relevant (0)

|                                                                     |   |   |   |   |
|---------------------------------------------------------------------|---|---|---|---|
| Access to labour market/ availability of jobs                       | 1 | 2 | 3 | 0 |
| Access to medical care                                              | 1 | 2 | 3 | 0 |
| Access to psychological care                                        | 1 | 2 | 3 | 0 |
| Access to financial support                                         | 1 | 2 | 3 | 0 |
| Access to education                                                 | 1 | 2 | 3 | 0 |
| Access to adequate housing                                          | 1 | 2 | 3 | 0 |
| Access to residence permit                                          | 1 | 2 | 3 | 0 |
| Access to legal aid                                                 | 1 | 2 | 3 | 0 |
| Access to security forces or court case when you encounter problems | 1 | 2 | 3 | 0 |
| Protection against exploitation in work place                       | 1 | 2 | 3 | 0 |
| Lack of safety                                                      | 1 | 2 | 3 | 0 |
| Preconceptions and misconceptions about refugees                    | 1 | 2 | 3 | 0 |

**54** Are you learning Polish

- Yes  
 No

→ go to question 57

→ go to question 55

**55** If you don't, why?

- I don't find it necessary  
 Too difficult  
 Other reasons (please specify) \_\_\_\_\_  
 I speak Polish

**56** Do you wish to learn Polish?

- Yes  
 No

**57** Have you ever had a paid job in Poland, either as an employee or as self-employed?

- Yes  
 No

**58** Are you currently working?

- Yes  
 No

→ go to question 59

→ go to question 66

**59** How long did it take you to start working after your arrival in Poland?

\_\_\_\_\_ (Days)



**60 What is your current job performed in Poland?**

- Unskilled worker (e.g. maid, waiter, kitchen help, agricultural worker, cleaner, babysitter)
- Skilled worker or craftsman (e.g. welder, machine operator, qualified bricklayer, tailor, nurse, operator of agricultural machinery, forester)
- Service employee or salesperson (hairdresser, beautician, cook)
- Office worker, a technician and other middle personnel (secretary, electrician)
- Specialist (lawyer, doctor, bookkeeper, lecturer, IT specialist, teacher, translator)
- Manager/supervisor/director
- Other (please specify) \_\_\_\_\_

**61 In which sector is your current job performed in Poland?**

- Agriculture
- Manufacturing (industry and crafts)
- Retail/ wholesale trade
- Tourism
- Foodservice
- Construction and renovation services
- Household services
- Education and translation
- Health and social service
- IT/banking/accounting/consulting/marketing
- Other (please specify) \_\_\_\_\_

**62 Is your current job performed in Poland:**

- Below your qualifications
- Above your qualifications
- At the same level qualifications as a job performed in Ukraine

**63 How did you find your current job?**

- Through family or friends
- Through NGO
- Through official institution (e.g. Job center)
- Through intermediaries
- Another way (how?) \_\_\_\_\_

**64 How many hours per week do you work currently?**

\_\_\_\_\_ (Hours weekly)

**65 What level of Polish is required for your job?**

- No proficiency
- Only basic communication skills
- Good command/ good working knowledge
- Very good command
- Excellent command/ highly proficient in spoken and written
- Near native/ fluent

**To what extent here in Poland do the following help you in coping with any difficult situation you are facing?**

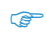

Where "99" means "not relevant", "1" means not at all and "10" means very much Not at all Very much Not relevant.

Family 1 2 3 4 5 6 7 8 9 10 99

Friends 1 2 3 4 5 6 7 8 9 10 99

Faith/ Religion/ Spirituality 1 2 3 4 5 6 7 8 9 10 99

Work /school 1 2 3 4 5 6 7 8 9 10 99

Social/institutional benefits system 1 2 3 4 5 6 7 8 9 10 99

Being out in Nature (e.g. in the wood, at the park) 1 2 3 4 5 6 7 8 9 10 99

1 2 3 4 5 6 7 8 9 10 99

*Please add to the list any important aspects that you find in Poland.*

Other (please briefly specify)

\_\_\_\_\_

1 2 3 4 5 6 7 8 9 10 99

## NACE-Codes

- A** Agriculture, forestry and fishing
- B** Mining and quarrying
- C** Manufacturing
- D** Electricity, gas, steam and air conditioning supply
- E** Water supply; sewerage; waste management and remediation activities
- F** Construction
- G** Wholesale and retail trade; repair of motor vehicles and motorcycles
- H** Transporting and storage
- I** Accommodation and food service activities
- J** Information and communication
- K** Financial and insurance activities
- L** Real estate activities
- M** Professional, scientific and technical activities
- N** Administrative and support service activities
- O** Public administration and defense; compulsory social security
- P** Education
- Q** Human health and social work activities
- R** Arts, entertainment and recreation
- S** Other services activities
- T** Activities of households as employers; undifferentiated goods - and services - producing activities of households for own use
- U** Activities of extraterritorial organizations and bodies

## ISCO-Codes

- 0 Armed forces occupations**
- 1 Managers**
  - 11 Chief executives, senior officials and legislators
  - 12 Administrative and commercial managers
  - 13 Production and specialized services managers
  - 14 Hospitality, retail and other services managers
- 2 Professionals**
  - 21 Science and engineering professionals
  - 22 Health professionals
  - 23 Teaching professionals
  - 24 Business and administration professionals
  - 25 Information and communications technology professionals
  - 26 Legal, social and cultural professionals
- 3 Technicians and associate professionals**
  - 31 Science and engineering associate professionals
  - 32 Health associate professionals
  - 33 Business and administration associate professionals
  - 34 Legal, social, cultural and related associate professionals
  - 35 Information and communications technicians
- 4 Clerical support workers**
  - 41 General and keyboard clerks
  - 42 Customer services clerks
  - 43 Numerical and material recording clerks
  - 44 Other clerical support workers
- 5 Service and sales workers**
  - 51 Personal service workers
  - 52 Sales workers
  - 53 Personal care workers
  - 54 Protective services workers
- 6 Skilled agricultural, forestry and fishery workers**
  - 61 Market-oriented skilled agricultural workers
  - 62 Market-oriented skilled forestry, fishery and hunting workers
  - 63 Subsistence farmers, fishers, hunters and gatherers
- 7 Craft and related trades workers**
  - 71 Building and related trades workers, excluding electricians
  - 72 Metal, machinery and related trades workers
  - 73 Handicraft and printing workers
  - 74 Electrical and electronics trades workers
  - 75 Food processing, wood working, garment and other craft and related trades workers
- 8 Plant and machine operators, and assemblers**
  - 81 Stationary plant and machine operators
  - 82 Assemblers
  - 83 Drivers and mobile plant operators
- 9 Elementary occupations**
  - 91 Cleaners and helpers
  - 92 Agricultural, forestry and fishery laborers
  - 93 Laborers in mining, construction, manufacturing and transport
  - 94 Food preparation assistants
  - 95 Street and related sales and service workers
  - 96 Refuse workers and other elementary workers
