# Supplementary material for: High self-selection of Ukrainian refugees into Europe: Evidence from Kraków and Vienna
Source: PubMed Central journal article supplement (PMC10732457; doi:10.1371/journal.pone.0279783), 2023-12-20
Supplement: pone.0279783.s005.pdf [file pone.0279783.s005.pdf]

**S2 Table. Previous employment and planned labour market participation in host country, persons aged 18-59 years, in %.**

|                                               | Women  |        |                       | Men    |        |                       |
|-----------------------------------------------|--------|--------|-----------------------|--------|--------|-----------------------|
|                                               | Kraków | Vienna | Vienna incl. partners | Kraków | Vienna | Vienna incl. partners |
| <b>Ever participated in labour market</b>     |        |        |                       |        |        |                       |
| Yes                                           | 84.1   | 90.4   | 89.8                  | (90.9) | 82.3   | 86.3                  |
| No                                            | 15.5   | 7.7    | 8.2                   | (9.1)  | 16.7   | 10.3                  |
| Don't know/no answer                          | 0.5    | 1.9    | 2.0                   | (0.0)  | 1.0    | 3.4                   |
| <b>Work status before leaving the country</b> |        |        |                       |        |        |                       |
| Employed                                      | 48.7   | 51.9   | 51.4                  | (45.5) | 37.5   | 45.5                  |
| Self-employed                                 | 12.5   | 21.2   | 20.6                  | (27.3) | 30.2   | 25.3                  |
| Working in a family business or a farm        | 2.1    | 1.7    | 1.7                   | (9.1)  | 1.0    | 3.4                   |
| Student, in education or training             | 1.8    | 2.0    | 1.9                   | (0.0)  | 3.1    | 1.7                   |
| Looking after home/family                     | 10.6   | 6.5    | 6.7                   | (0.0)  | 3.1    | 1.7                   |
| Unemployed                                    | 4.6    | 3.8    | 4.0                   | (0.0)  | 2.1    | 3.4                   |
| Other/no answer                               | 3.7    | 3.3    | 3.5                   | (0.0)  | 5.2    | 5.2                   |
| Never participated in LM                      | 15.9   | 9.6    | 10.2                  | (9.1)  | 17.7   | 13.7                  |
| <i>N</i>                                      | 433    | 899    | 965                   | (11)   | 96     | 233                   |

Sources: UkrPL and UkrAiA.

Note: Columns "incl. partners" include partners living in Austria/Vienna at the time of the survey. Percentages in parentheses indicate low case numbers.
