# Supplementary material for: High self-selection of Ukrainian refugees into Europe: Evidence from Kraków and Vienna
Source: PubMed Central journal article supplement (PMC10732457; doi:10.1371/journal.pone.0279783), 2023-12-20
Supplement: pone.0279783.s006.pdf [file pone.0279783.s006.pdf]

**S3 Table. Employment in Ukraine, 2021, in %.**

|                     | Persons aged 15-70 |      |       | Persons aged 15-59 |      |       |
|---------------------|--------------------|------|-------|--------------------|------|-------|
|                     | Women              | Men  | Total | Women              | Men  | Total |
| Employed            | 50.4               | 61.5 | 55.7  | 60.7               | 69.9 | 65.3  |
| Unemployed          | 5.7                | 6.5  | 6.1   | 7.2                | 7.7  | 7.5   |
| Out of labour force | 43.9               | 31.9 | 38.2  | 32.1               | 22.3 | 27.3  |
| Total               | 100                | 100  | 100   | 100                | 100  | 100   |

Sources: State Statistics Service of Ukraine [51].
