# Supplementary material for: High self-selection of Ukrainian refugees into Europe: Evidence from Kraków and Vienna
Source: PubMed Central journal article supplement (PMC10732457; doi:10.1371/journal.pone.0279783), 2023-12-20
Supplement: pone.0279783.s008.pdf [file pone.0279783.s008.pdf]

**S5 Table. Working hours of persons aged 15-70 years, Ukraine, 2021, in %.**

|                    | Women | Men  | Total |
|--------------------|-------|------|-------|
| Up to 19 hours     | 3.0   | 1.1  | 2.0   |
| 20–29 hours        | 7.0   | 3.9  | 5.3   |
| 30–39 hours        | 10.2  | 8.1  | 9.1   |
| 40 hours           | 69.9  | 71.0 | 70.5  |
| More than 40 hours | 9.9   | 15.9 | 13.1  |
| Total              | 100   | 100  | 100   |

Sources: State Statistics Service of Ukraine [51].
