# Supplementary material for: High self-selection of Ukrainian refugees into Europe: Evidence from Kraków and Vienna
Source: PubMed Central journal article supplement (PMC10732457; doi:10.1371/journal.pone.0279783), 2023-12-20
Supplement: pone.0279783.s009.pdf [file pone.0279783.s009.pdf]

**S6 Table. Usual working hours and plans for host country, persons aged 18-59 years, in %.**

|                                                   | Women  |        | Men    |        |
|---------------------------------------------------|--------|--------|--------|--------|
|                                                   | Kraków | Vienna | Kraków | Vienna |
| <b>Usual working hours, if ever worked</b>        |        |        |        |        |
| 1 to 9 hour(s)                                    | 20.9   | 10.7   | (0.0)  | 3.8    |
| 10 to 19 hours                                    | 11.0   | 8.4    | (10.0) | 6.3    |
| 20 to 34 hours                                    | 9.9    | 16.0   | (0.0)  | 15.2   |
| 35 or more hours                                  | 47.8   | 56.8   | (60.0) | 54.4   |
| Seasonal work                                     | 0.8    | 0.7    | (0.0)  | 1.3    |
| Hours vary considerably                           | 6.6    | 4.3    | (30.0) | 16.5   |
| No answer                                         | 3.0    | 3.1    | (0.0)  | 2.5    |
| N                                                 | 364    | 813    | (10)   | (79)   |
| <b>Future plans within host country</b>           |        |        |        |        |
| Search for a job                                  |        | 72.2   |        | 70.8   |
| To continue school/studying                       |        | 5.2    |        | 7.3    |
| Do not know                                       |        | 19.6   |        | 17.7   |
| No answer                                         |        | 3.0    |        | 4.2    |
| N                                                 |        | 899    |        | 96     |
| <b>Intended working hours, if wanting to work</b> |        |        |        |        |
| Less than 20 hours                                |        | 11.5   |        | 7.6    |
| 20 to 34 hours                                    |        | 49.3   |        | 26.6   |
| 35 or more hours                                  |        | 37.9   |        | 64.6   |
| No answer                                         |        | 1.3    |        | 1.3    |
| N                                                 |        | 671    |        | 79     |

Sources: UkrPL and UkrAiA.
