# Supplementary material for: High self-selection of Ukrainian refugees into Europe: Evidence from Kraków and Vienna
Source: PubMed Central journal article supplement (PMC10732457; doi:10.1371/journal.pone.0279783), 2023-12-20
Supplement: pone.0279783.s010.pdf [file pone.0279783.s010.pdf]

**S7 Table. Intentions to stay in Country of Arrival (a) and to return to Ukraine (b), in %.**

|                                                                          | (a) Do you plan to stay in Country of Arrival (CoA)? |                 |             |                        | (b) Which statements below may express your considerations about returning to Ukraine? |                                          |                                   |                                        |                                      |                        |
|--------------------------------------------------------------------------|------------------------------------------------------|-----------------|-------------|------------------------|----------------------------------------------------------------------------------------|------------------------------------------|-----------------------------------|----------------------------------------|--------------------------------------|------------------------|
|                                                                          | Stay in CoA                                          | Not stay in CoA | Do not know | Chi <sup>2</sup> -test | I have nothing to return to in Ukraine                                                 | I want to return as soon as the war ends | I may return in case the war ends | I may return even if the war continues | I do not have an idea, I do not know | Chi <sup>2</sup> -test |
| <i>Survey</i>                                                            |                                                      |                 |             |                        |                                                                                        |                                          |                                   |                                        |                                      |                        |
| Kraków (Poland)                                                          | 28                                                   | 22              | 51          |                        | 7                                                                                      | 36                                       | 28                                | 14                                     | 15                                   |                        |
| Vienna (Austria)                                                         | 47                                                   | 9               | 44          | ***                    | 8                                                                                      | 34                                       | 25                                | 6                                      | 27                                   | ***                    |
| <i>Gender</i>                                                            |                                                      |                 |             |                        |                                                                                        |                                          |                                   |                                        |                                      |                        |
| Male                                                                     | 55                                                   | 9               | 36          |                        | 16                                                                                     | 34                                       | 24                                | 6                                      | 20                                   |                        |
| Female                                                                   | 40                                                   | 13              | 47          | **                     | 7                                                                                      | 35                                       | 26                                | 8                                      | 24                                   | *                      |
| <i>Age</i>                                                               |                                                      |                 |             |                        |                                                                                        |                                          |                                   |                                        |                                      |                        |
| Below 25                                                                 | 50                                                   | 10              | 40          |                        | 7                                                                                      | 36                                       | 25                                | 8                                      | 23                                   |                        |
| 25+                                                                      | 40                                                   | 13              | 47          | *                      | 9                                                                                      | 26                                       | 29                                | 12                                     | 24                                   | *                      |
| <i>Residence before leaving Ukraine</i>                                  |                                                      |                 |             |                        |                                                                                        |                                          |                                   |                                        |                                      |                        |
| Kyiv                                                                     | 39                                                   | 15              | 46          |                        | 4                                                                                      | 42                                       | 24                                | 8                                      | 22                                   |                        |
| Central Ukraine                                                          | 41                                                   | 12              | 47          |                        | 11                                                                                     | 35                                       | 24                                | 10                                     | 21                                   |                        |
| Western Ukraine                                                          | 42                                                   | 16              | 43          |                        | 3                                                                                      | 29                                       | 29                                | 14                                     | 25                                   |                        |
| Southern Ukraine                                                         | 42                                                   | 11              | 47          |                        | 6                                                                                      | 36                                       | 25                                | 7                                      | 27                                   |                        |
| Eastern Ukraine                                                          | 42                                                   | 10              | 47          |                        | 17                                                                                     | 28                                       | 28                                | 4                                      | 22                                   | ***                    |
| <i>Highest level of education</i>                                        |                                                      |                 |             |                        |                                                                                        |                                          |                                   |                                        |                                      |                        |
| Secondary general education or less                                      | 49                                                   | 7               | 45          |                        | 11                                                                                     | 23                                       | 32                                | 6                                      | 28                                   |                        |
| Vocational education                                                     | 37                                                   | 17              | 45          |                        | 7                                                                                      | 34                                       | 25                                | 7                                      | 27                                   |                        |
| Bachelor degree                                                          | 41                                                   | 15              | 44          |                        | 6                                                                                      | 33                                       | 24                                | 10                                     | 27                                   |                        |
| Master degree or PhD                                                     | 40                                                   | 12              | 48          | *                      | 8                                                                                      | 38                                       | 26                                | 8                                      | 20                                   | ***                    |
| <i>Skills in dominant language of CoA</i>                                |                                                      |                 |             |                        |                                                                                        |                                          |                                   |                                        |                                      |                        |
| No skills in German/Polish language                                      | 39                                                   | 13              | 48          |                        | 8                                                                                      | 36                                       | 25                                | 8                                      | 23                                   |                        |
| Skills in German/Polish language                                         | 50                                                   | 11              | 38          | **                     | 7                                                                                      | 29                                       | 29                                | 9                                      | 26                                   |                        |
| <i>Relationship status</i>                                               |                                                      |                 |             |                        |                                                                                        |                                          |                                   |                                        |                                      |                        |
| Cohabiting or married partner is not in Ukraine                          | 48                                                   | 10              | 43          |                        | 8                                                                                      | 31                                       | 29                                | 6                                      | 26                                   |                        |
| Cohabiting or married partner is still in Ukraine                        | 30                                                   | 18              | 52          |                        | 4                                                                                      | 45                                       | 24                                | 11                                     | 15                                   |                        |
| Other family status: divorced, widowed, single (with or without partner) | 47                                                   | 10              | 43          | ***                    | 11                                                                                     | 27                                       | 26                                | 7                                      | 29                                   | ***                    |
| <i>Reasons for choice of CoA</i>                                         |                                                      |                 |             |                        |                                                                                        |                                          |                                   |                                        |                                      |                        |
| Unplanned, landed in CoA by chance                                       | 42                                                   | 8               | 50          |                        | 12                                                                                     | 30                                       | 27                                | 5                                      | 27                                   |                        |
| Reason "unplanned, ..." not reported                                     | 41                                                   | 14              | 45          | **                     | 6                                                                                      | 36                                       | 26                                | 9                                      | 22                                   | ***                    |
| Family, friends or colleagues in CoA                                     | 41                                                   | 13              | 45          |                        | 6                                                                                      | 35                                       | 27                                | 9                                      | 23                                   |                        |
| Reason "family or ..." not reported                                      | 40                                                   | 12              | 47          |                        | 10                                                                                     | 33                                       | 25                                | 7                                      | 24                                   | *                      |
| Easier to find work in CoA                                               | 70                                                   | 1               | 28          |                        | 13                                                                                     | 21                                       | 31                                | 4                                      | 30                                   |                        |
| Reason "easier to ..." not reported                                      | 40                                                   | 13              | 47          | ***                    | 7                                                                                      | 35                                       | 26                                | 9                                      | 23                                   | *                      |
| Other reason reported (geographical proximity, welfare/health system)    | 35                                                   | 17              | 48          |                        | 8                                                                                      | 39                                       | 21                                | 12                                     | 20                                   |                        |

|                                |       |    |    |    |  |       |    |    |    |    |      |
|--------------------------------|-------|----|----|----|--|-------|----|----|----|----|------|
| No other reason reported, ref. | 43    | 12 | 46 | ** |  | 8     | 33 | 27 | 7  | 25 | **   |
| No reason reported             | 11    | 26 | 63 |    |  | 8     | 58 | 8  | 17 | 8  |      |
| At least one reason reported   | 41    | 13 | 46 | *  |  | 8     | 34 | 26 | 8  | 23 | n.f. |
| N                              | 1,547 |    |    |    |  | 1,540 |    |    |    |    |      |

Sources: UkrPL and UkrAiA.

\*  $p < 0.05$ , \*\*  $p < 0.01$ , \*\*\*  $p < 0.001$ . n.f. = Chi<sup>2</sup>-test not feasible (low cell count).
