# Supplementary material for: High self-selection of Ukrainian refugees into Europe: Evidence from Kraków and Vienna
Source: PubMed Central journal article supplement (PMC10732457; doi:10.1371/journal.pone.0279783), 2023-12-20
Supplement: pone.0279783.s011.pdf [file pone.0279783.s011.pdf]

**S8 Table. Confidence intervals of estimated coefficients (95%) for intentions to stay in Country of Arrival (a) and to return to Ukraine (b), average marginal effects shown in Table 2 in main text.**

|                                                                          | (a) Do you plan to stay in Country of Arrival (CoA)? |                 |              | (b) Which statements below may express your considerations about returning to Ukraine? |                                          |                                   |                                        |                                      |
|--------------------------------------------------------------------------|------------------------------------------------------|-----------------|--------------|----------------------------------------------------------------------------------------|------------------------------------------|-----------------------------------|----------------------------------------|--------------------------------------|
|                                                                          | Stay in CoA                                          | Not stay in CoA | Do not know  | I have nothing to return to in Ukraine                                                 | I want to return as soon as the war ends | I may return in case the war ends | I may return even if the war continues | I do not have an idea, I do not know |
| Survey                                                                   |                                                      |                 |              |                                                                                        |                                          |                                   |                                        |                                      |
| Kraków (Poland)                                                          | [-.24; -.14]                                         | [.07; .17]      | [.01; .14]   | [-.04; .02]                                                                            | [-.05; .07]                              | [.00; .11]                        | [.03; .11]                             | [-.17; -.08]                         |
| Vienna (Austria), ref.                                                   | -                                                    | -               | -            | -                                                                                      | -                                        | -                                 | -                                      | -                                    |
| Gender                                                                   |                                                      |                 |              |                                                                                        |                                          |                                   |                                        |                                      |
| Male, ref.                                                               |                                                      |                 |              |                                                                                        |                                          |                                   |                                        |                                      |
| Female                                                                   | [-.13; .04]                                          | [-.10; .05]     | [-.03; .17]  | [-.10; -.02]                                                                           | [-.16; .02]                              | [-.04; .13]                       | [-.08; .04]                            | [.02; .18]                           |
| Age                                                                      |                                                      |                 |              |                                                                                        |                                          |                                   |                                        |                                      |
| Below 25                                                                 | [-.09; .08]                                          | [-.04; .08]     | [-.11; .08]  | [-.05; .04]                                                                            | [-.10; .07]                              | [-.06; .10]                       | [.04; .14]                             | [-.16; -.01]                         |
| 25+, ref.                                                                | -                                                    | -               | -            | -                                                                                      | -                                        | -                                 | -                                      | -                                    |
| Residence before leaving Ukraine                                         |                                                      |                 |              |                                                                                        |                                          |                                   |                                        |                                      |
| Kyiv, ref.                                                               | -                                                    | -               | -            | -                                                                                      | -                                        | -                                 | -                                      | -                                    |
| Central Ukraine                                                          | [-.02; .14]                                          | [-.11; .00]     | [-.09; .08]  | [.02; .11]                                                                             | [-.14; .01]                              | [-.07; .07]                       | [-.04; .04]                            | [-.06; .07]                          |
| Western Ukraine                                                          | [-.03; .14]                                          | [-.08; .04]     | [-.12; .05]  | [-.03; .04]                                                                            | [-.23; -.07]                             | [-.04; .12]                       | [.00; .12]                             | [-.03; .11]                          |
| Southern Ukraine                                                         | [-.02; .11]                                          | [-.11; -.01]    | [-.05; .09]  | [-.01; .05]                                                                            | [-.12; .02]                              | [-.06; .07]                       | [-.05; .02]                            | [-.02; .10]                          |
| Eastern Ukraine                                                          | [-.01; .13]                                          | [-.11; -.01]    | [-.08; .08]  | [.07; .16]                                                                             | [-.19; -.05]                             | [-.03; .11]                       | [-.07; .00]                            | [-.06; .06]                          |
| Highest level of education                                               |                                                      |                 |              |                                                                                        |                                          |                                   |                                        |                                      |
| Secondary general education or less                                      | [-.02; .15]                                          | [-.14; -.05]    | [-.06; .12]  | [-.01; .09]                                                                            | [-.16; .00]                              | [-.02; .14]                       | [-.09; .02]                            | [-.05; .11]                          |
| Vocational education                                                     | [-.08; .09]                                          | [-.06; .06]     | [-.09; .09]  | [-.03; .05]                                                                            | [-.07; .09]                              | [-.07; .09]                       | [-.08; .01]                            | [-.07; .08]                          |
| Bachelor degree, ref.                                                    | -                                                    | -               | -            | -                                                                                      | -                                        | -                                 | -                                      | -                                    |
| Master degree or PhD                                                     | [-.06; .06]                                          | [-.07; .02]     | [-.04; .09]  | [.00; .06]                                                                             | [-.02; .09]                              | [-.03; .08]                       | [-.05; .03]                            | [-.13; -.02]                         |
| Skills in dominant language of CoA                                       |                                                      |                 |              |                                                                                        |                                          |                                   |                                        |                                      |
| No skills in German/Polish language, ref.                                | -                                                    | -               | -            | -                                                                                      | -                                        | -                                 | -                                      | -                                    |
| Skills in German/Polish language                                         | [.03; .16]                                           | [-.06; .03]     | [-.15; -.01] | [-.05; .03]                                                                            | [-.11; .02]                              | [-.04; .08]                       | [-.05; .02]                            | [-.01; .10]                          |
| Relationship status                                                      |                                                      |                 |              |                                                                                        |                                          |                                   |                                        |                                      |
| Cohabiting or married partner is not in Ukraine, ref.                    | -                                                    | -               | -            | -                                                                                      | -                                        | -                                 | -                                      | -                                    |
| Cohabiting or married partner is still in Ukraine                        | [-.20; -.06]                                         | [.02; .11]      | [-.01; .13]  | [-.06; .01]                                                                            | [.08; .21]                               | [-.13; .00]                       | [.01; .08]                             | [-.17; -.05]                         |
| Other family status: divorced, widowed, single (with or without partner) | [-.06; .08]                                          | [-.04; .05]     | [-.08; .06]  | [.00; .07]                                                                             | [-.08; .05]                              | [-.11; .02]                       | [-.02; .05]                            | [-.04; .08]                          |
| Reasons for choice of CoA                                                |                                                      |                 |              |                                                                                        |                                          |                                   |                                        |                                      |
| Unplanned, landed in CoA by chance                                       | [-.11; .07]                                          | [-.16; -.01]    | [.01; .20]   | [-.01; .08]                                                                            | [-.11; .07]                              | [-.11; .07]                       | [-.07; .04]                            | [-.07; .09]                          |
| Reason “unplanned, ...” not reported, ref.                               | -                                                    | -               | -            | -                                                                                      | -                                        | -                                 | -                                      | -                                    |
| Family, friends or colleagues in CoA                                     | [-.14; .04]                                          | [-.08; .04]     | [-.02; .16]  | [-.05; .04]                                                                            | [-.05; .11]                              | [-.10; .06]                       | [-.02; .07]                            | [-.11; .04]                          |
| Reason “family or ...” not reported, ref.                                | -                                                    | -               | -            | -                                                                                      | -                                        | -                                 | -                                      | -                                    |
| Easier to find work in CoA                                               | [.14; .41]                                           | [-.43; -.02]    | [-.22; .12]  | [-.01; .09]                                                                            | [-.22; .04]                              | [-.07; .15]                       | [-.12; .05]                            | [-.05; .15]                          |
| Reason “easier to ...” not reported, ref.                                | -                                                    | -               | -            | -                                                                                      | -                                        | -                                 | -                                      | -                                    |
| Other reason reported (geographical                                      | [-.11; .05]                                          | [-.08; -.04]    | [-.03; .14]  | [-.03; .05]                                                                            | [-.01; .14]                              | [-.17; -.02]                      | [.00; .08]                             | [-.09; .05]                          |

|                                    |              |             |            |             |             |             |             |             |
|------------------------------------|--------------|-------------|------------|-------------|-------------|-------------|-------------|-------------|
| proximity, welfare/health system)  |              |             |            |             |             |             |             |             |
| No other reason reported, ref.     | -            | -           | -          | -           | -           | -           | -           | -           |
| No reason reported                 | [-.70; -.04] | [-.10; .17] | [.03; .64] | [-.07; .23] | [-.06; .53] | [-.66; .16] | [-.04; .21] | [-.52; .22] |
| At least one reason reported, ref. | -            | -           | -          | -           | -           | -           | -           | -           |

Sources: UkrPL and UkrAiA.

Note: Models additionally control for survey mode (paper-and-pencil or web survey), religious denomination, subjective health, employment status before leaving Ukraine and parenthood status.
