# Supplementary material for: High self-selection of Ukrainian refugees into Europe: Evidence from Kraków and Vienna
Source: PLOS journal article supplement (doi:10.1371/journal.pone.0279783), 2023-12-20
Supplement: S3 (10.1371/journal.pone.0279783.s003) [file journal.pone.0279783.s003]

# UkrAiA

## Ukrainian Arrivals in Austria

### **A Rapid-Response Survey on Sociodemographic Characteristics, Needs and Resources**

Vienna University of Economics and Business  
Welthandelsplatz 1, 1020 Vienna

Vienna Institute of Demography/Austrian Academy of Sciences  
Vordere Zollamtsstraße 3, 1030 Vienna

Salzburg University of Applied Sciences  
Urstein Süd 1, 5412 Puch

## Questionnaire

This is a scientific survey whose purpose is to gain demographic information about Ukrainians who recently arrived in Austria. The project is conducted by independent academic researchers from the Vienna University of Economics and Business and the Austrian Academy of Sciences.

Your answers will be treated strictly confidentially and anonymously. They are subject to data protection and statistical confidentiality. All results will be exclusively used for the purpose of the current survey.

This study is co-financed by the City of Vienna (MA17) and the Vienna Social Fund (FSW).

**1 What is your sex?**

- Female  Male  Divers

**2 How old are you?**

\_\_\_\_\_ Years

**3 In which country were you born?**

- Ukraine  Russia  Other European country  Non-European country

**4 Which country was your last place of residence?**

- Ukraine  Other country

**5 What is your citizenship? Multiple answers are possible.**

- Ukraine  Russia  Other European country  Non-European country

**6 Where in Ukraine have you lived most of your life?**

- |                                                                      |                                             |
|----------------------------------------------------------------------|---------------------------------------------|
| <input type="checkbox"/> Autonomous Republic of Crimea (before 2014) | <input type="checkbox"/> Luhanska oblast    |
| <input type="checkbox"/> Cherkaska oblast                            | <input type="checkbox"/> Lvivska oblast     |
| <input type="checkbox"/> Chernihivska oblast                         | <input type="checkbox"/> Mykolaivska oblast |
| <input type="checkbox"/> Chernivetska oblast                         | <input type="checkbox"/> Odeska oblast      |
| <input type="checkbox"/> Dnipropetrovska oblast                      | <input type="checkbox"/> Poltavska oblast   |
| <input type="checkbox"/> Donetska oblast                             | <input type="checkbox"/> Rivnenska oblast   |
| <input type="checkbox"/> Ivano-Frankivska oblast                     | <input type="checkbox"/> Sumska oblast      |
| <input type="checkbox"/> Kharkivska oblast                           | <input type="checkbox"/> Ternopilska oblast |
| <input type="checkbox"/> Khersonska oblast                           | <input type="checkbox"/> Vinnytska oblast   |
| <input type="checkbox"/> Khmelnytska oblast                          | <input type="checkbox"/> Volynska oblast    |
| <input type="checkbox"/> Kirovohradska oblast                        | <input type="checkbox"/> Zakarpatska oblast |
| <input type="checkbox"/> Kyiv                                        | <input type="checkbox"/> Zaporizka oblast   |
| <input type="checkbox"/> Kyivska oblast                              | <input type="checkbox"/> Zhytomyrska oblast |

**7 What type of residence did you live in before you came here?**

- |                                              |                                                         |
|----------------------------------------------|---------------------------------------------------------|
| <input type="checkbox"/> Your own house      | <input type="checkbox"/> A rented apartment             |
| <input type="checkbox"/> Your family's house | <input type="checkbox"/> A shared apartment with others |
| <input type="checkbox"/> Your own apartment  | <input type="checkbox"/> Other                          |

**8 What is your religion?**

- |                                             |                                              |
|---------------------------------------------|----------------------------------------------|
| <input type="checkbox"/> Christian Orthodox | <input type="checkbox"/> None (e.g. Atheist) |
| <input type="checkbox"/> Greek Catholic     | <input type="checkbox"/> Other religion      |

**9 What is your highest level of educational attainment?**

- Less than secondary general education  
 Secondary general education (Atestat Pro Povnu Zagal'nu Srednyu Osvitu)  
 Vocational education  
 Bachelor (Bakalavr)  
 Master (Magistr)  
 Doctor of Philosophy, Arts or Science

**10 How many years of education have you completed?**

\_\_\_\_\_ Years

**11 Which language(s) do you speak?**

- Ukrainian       Russian       English       German  
 Polish       Hungarian       Romanian       French  
 Spanish       Portugese       Other language(s)

**12 Did you ever actively participate in the labor market?**

- Yes → [go to question 13](#)  
 No → [go to question 18](#)

**13 What is your main occupation?**

 Please enter ISCO 2-digit code from the list on the final page.

\_\_\_\_\_

**14 Please enter the name/description of the occupation.**

\_\_\_\_\_

**15 In which economic branch have you been active or employed?**

 Please enter NACE code from the list on the final page.

\_\_\_\_\_

**16 Which best describes your work status before leaving the country?**

- Employed  
 Self-employed  
 Working with/ for family member in a family business or a farm  
 Student, in education or training  
 Looking after home/family  
 Unemployed  
 Other

**17 How many hours did you usually work each week?**

- 1 to 9 hours       35 or more hours  
 10 to 19 hours       Seasonal work  
 20 to 34 hours       Hours vary considerably

**18 Have you completed any kind of training in nursing or care?**

- Yes, with academic graduation       Yes, without graduation  
 Yes, with non-academic graduation       No

**19 Have you ever worked in nursing or care?**

- Yes  
                                         \_\_\_\_\_ Years in general care  
                                         \_\_\_\_\_ Years in geriatric care  
                                         \_\_\_\_\_ Years in pedriatic care  
 No

**20 Are you interested to start or continue a training in nursing/care in Austria?**

- Yes       No

**21 Do you plan to stay in Austria?**

- Yes → [go to question 23](#)
- Do not know → [go to question 23](#)
- No → [go to question 22](#)

**22 Where do you plan to go? Multiple answers are possible.**

- Germany
- Italy
- Switzerland
- Spain
- Sweden
- Portugal
- United Kingdom
- Czech Republic
- Other European country
- Non-European country

**23 What do you want to do in Austria?**

- Search for a job → [go to question 24](#)
- To continue school/studying → [go to question 25](#)
- Do not know → [go to question 25](#)

**24 How many hours do you want to work each week?**

- Less than 20 hours
- 20 to 34 hours
- 35 or more hours

**25 What is your general assessment of your health?**

- Very good
- Good
- Neither good nor bad
- Bad
- Very bad

**26 Do you have any long-term (chronic) illness or health problems?**

- Yes
- No

**27 For the past six months at least, to what extent have you been limited because of a health problem in activities people usually do?**

- Very much
- To some extent
- Not at all

**28 In times of trouble, can you count on at least some of your family or friends?**

- Yes, very much
- Yes, to some extent
- No, not at all

**29 Are you regularly seeking support in (online) spiritual events or praying to god regularly?**

- Yes, very much
- Yes, to some extent
- No, not at all

**30 Are you regularly seeking support in (online) community organization (Facebook, Telegram groups for Ukrainian refugees)?**

- Yes, very much
- Yes, to some extent
- No, not at all

**31 Did you feel that you were welcome when you arrived in Austria?**

- Totally
- Mostly
- In some ways
- Hardly at all
- Not at all
- Do not know

**32 When did you arrive in Austria?**

\_\_\_\_\_ (Day/Month/Year)

**33 How long did it take you to arrive in Austria?**

\_\_\_\_\_ Days

**34** How did you come to Austria? Multiple answers are possible.

- Through Poland
- Through Hungary
- Through Czechia
- Through Slovakia
- Through Romania
- Through another country

**35** Why did you flee to Austria? Multiple answers are possible.

- By chance/ not planned/ just ended up here
- I have family here
- I have friends here
- I know people here related to my/my partner's work
- Because it is easier to find work here
- Because the social welfare benefits are better here
- Because the medical care is better here

Other \_\_\_\_\_

**36** How much did your journey to Austria cost (per person, in Ukrainian hryvnia)?

- < 3.000 ₴
- No costs
- >=3.000 ₴ < 6.000 ₴
- Do not know
- > 6.000 ₴

**37** Which statements below may express your considerations about returning to Ukraine?

- I have nothing to return to in Ukraine
- I want to return as soon as the war ends
- I may return in case the war ends
- I may return even if the war continues
- I do not have an idea, I do not know

**38** What is your family status?

- Married → go to question 39
- Cohabitation with partner → go to question 39
- Widowed → go to question 47
- Divorced → go to question 47
- Single → go to question 47

**39** How old is your partner?

\_\_\_\_\_ Years

**40** Where does your partner currently live?

- He/she is with me
- Ukraine
- Other country
- Do not know

**41** What is your partner's highest level of educational attainment?

- Less than secondary general education
- Secondary general education (Atestat Pro Povnu Zagal'nu Serednyu Osvitu)
- Vocational education
- Bachelor (Bakalavr)
- Master (Magistr)
- Doctor of Philosophy, Arts or Science
- Do not know

**42 Did your partner ever actively participate in the labor market?**

- Yes
- No [→ go to question 47](#)
- Do not know [→ go to question 47](#)

**43 What is your partner's main occupation?**

 Please enter ISCO 2-digit code from the list on the final page.

\_\_\_\_\_

**44 Please enter the name/description of your partner's occupation.**

\_\_\_\_\_

**45 In which economic branch is/was your partner active or employed?**

 Please enter NACE code from the list on the final page.

\_\_\_\_\_

**46 Which best describes the work status of your partner before the beginning of the war?**

- Employed
- Self-employed
- Working with/ for family member in a family business or a farm
- Student
- Looking after home/family
- Unemployed
- Other
- Do not know

**47 How many children do you have or have had (including deceased children)?**

- No children [→ go to question 54](#)

\_\_\_\_\_ Children [→ go to question 48](#)

**48-53 Can you specify some details about your children?**

|                                                | <b>48 Child 1</b>                                                                                                                                                                                | <b>49 Child 2</b>                                                                                                                                                                                | <b>50 Child 3</b>                                                                                                                                                                                |
|------------------------------------------------|--------------------------------------------------------------------------------------------------------------------------------------------------------------------------------------------------|--------------------------------------------------------------------------------------------------------------------------------------------------------------------------------------------------|--------------------------------------------------------------------------------------------------------------------------------------------------------------------------------------------------|
| <b>Age</b>                                     | <input type="checkbox"/> Less than 1 year<br>_____ Years                                                                                                                                         | <input type="checkbox"/> Less than 1 year<br>_____ Years                                                                                                                                         | <input type="checkbox"/> Less than 1 year<br>_____ Years                                                                                                                                         |
| <b>Sex</b>                                     | <input type="checkbox"/> Male<br><input type="checkbox"/> Female                                                                                                                                 | <input type="checkbox"/> Male<br><input type="checkbox"/> Female                                                                                                                                 | <input type="checkbox"/> Male<br><input type="checkbox"/> Female                                                                                                                                 |
| <b>Where does he/she currently live?</b>       | <input type="checkbox"/> Here with me<br><input type="checkbox"/> Ukraine<br><input type="checkbox"/> Other country<br><input type="checkbox"/> Deceased<br><input type="checkbox"/> Do not know | <input type="checkbox"/> Here with me<br><input type="checkbox"/> Ukraine<br><input type="checkbox"/> Other country<br><input type="checkbox"/> Deceased<br><input type="checkbox"/> Do not know | <input type="checkbox"/> Here with me<br><input type="checkbox"/> Ukraine<br><input type="checkbox"/> Other country<br><input type="checkbox"/> Deceased<br><input type="checkbox"/> Do not know |
| <b>How many years did he/she go to school?</b> | _____ Years                                                                                                                                                                                      | _____ Years                                                                                                                                                                                      | _____ Years                                                                                                                                                                                      |

|                                                | 51 Child 4                                                                                                                                                                                       | 52 Child 5                                                                                                                                                                                       | 53 Child 6                                                                                                                                                                                       |
|------------------------------------------------|--------------------------------------------------------------------------------------------------------------------------------------------------------------------------------------------------|--------------------------------------------------------------------------------------------------------------------------------------------------------------------------------------------------|--------------------------------------------------------------------------------------------------------------------------------------------------------------------------------------------------|
| <b>Age</b>                                     | <input type="checkbox"/> Less than 1 year<br>_____ Years                                                                                                                                         | <input type="checkbox"/> Less than 1 year<br>_____ Years                                                                                                                                         | <input type="checkbox"/> Less than 1 year<br>_____ Years                                                                                                                                         |
| <b>Sex</b>                                     | <input type="checkbox"/> Male<br><input type="checkbox"/> Female                                                                                                                                 | <input type="checkbox"/> Male<br><input type="checkbox"/> Female                                                                                                                                 | <input type="checkbox"/> Male<br><input type="checkbox"/> Female                                                                                                                                 |
| <b>Where does he/she currently live?</b>       | <input type="checkbox"/> Here with me<br><input type="checkbox"/> Ukraine<br><input type="checkbox"/> Other country<br><input type="checkbox"/> Deceased<br><input type="checkbox"/> Do not know | <input type="checkbox"/> Here with me<br><input type="checkbox"/> Ukraine<br><input type="checkbox"/> Other country<br><input type="checkbox"/> Deceased<br><input type="checkbox"/> Do not know | <input type="checkbox"/> Here with me<br><input type="checkbox"/> Ukraine<br><input type="checkbox"/> Other country<br><input type="checkbox"/> Deceased<br><input type="checkbox"/> Do not know |
| <b>How many years did he/she go to school?</b> | _____ Years                                                                                                                                                                                      | _____ Years                                                                                                                                                                                      | _____ Years                                                                                                                                                                                      |

**54 Do you currently expect a child?**

- Yes  No

**55 Did you arrive in Austria with other family members, friends or neighbors? Multiple answers are possible.**

- Mother  Father  Sister(s)  
 Mother in law  Father in law  Brother(s)  
 Cousin(s)  Nephew(s)/ niece(s)  Neighbor(s)  
 Friend(s)  Other acquaintances

**56 In what type of accommodation do you currently live here in Austria?**

- Rented single room  
 Rented apartment  
 Rented house  
 Own apartment  
 Own house  
 Living in the house or apartment with Austrian family  
 Temporary shelter exchanged among refugees  
 Collective Shelter  
 Other

**57 How do you feel in your neighbourhood in Austria?**

- Safe  Somewhat safe  Somewhat unsafe  Unsafe

**58 If you do not feel safe, why? Multiple answers are possible.**

- Racism/discrimination  Problems with Austrian locals  
 Theft  Some bad individuals  
 Place where I stay is unsafe  Austria is not safe  
 Threats of violence/verbal assault  Lack of proper shelter  
 Fear of closing the shelter or camp  Fear of other ethnic/religious groups  
 Other

The following statements were selected from the World Value Survey, a scientific investigation which seeks to find out about the beliefs, values and motivations of people throughout the world. There is no “right” or “wrong” answer to these questions.

Please note that we do not ask for your country’s official or legal stance on the following statements nor should your response be guided by social conventions and expectations. Rather, we are interested in your personal beliefs and values.

We would like to stress that your answers to these questions are completely confidential, our survey is conducted for purely scientific purposes and none of the data you provide us with will be forwarded to third parties.

**59** When jobs are scarce, men should have more rights to a job than women.

- Strongly agree
- Agree
- Neither agree/nor disagree
- Disagree
- Strongly disagree

**60** On the whole, men make better business executives than women do.

- Strongly agree
- Agree
- Disagree
- Strongly disagree

**61** Being a housewife is just as fulfilling as working for pay.

- Strongly agree
- Agree
- Disagree
- Strongly disagree

**62** What do you think about having a democratic political system as a way of governing Ukraine? Would you say it is a very good, fairly good, fairly bad or very bad way of governing?

- Very good
- Fairly good
- Fairly bad
- Very bad

**63** How much confidence do you have in the European Union? Is it a great deal of confidence, quite a lot of confidence, not very much confidence or none at all?

- A great deal
- Quite a lot
- Not very much
- None at all

**64** How much confidence do you have in the North Atlantic Treaty Organization (NATO)? A great deal of confidence, quite a lot of confidence, not very much confidence or none at all?

- A great deal
- Quite a lot
- Not very much
- None at all



**65** Apart from the fact of belonging to a religious community or not, how religious do you consider yourself?

 Please mark the appropriate number, where 0 indicates “not at all religious” and 10 “very religious”.

Not at all religious Very religious  
0      1      2      3      4      5      6      7      8      9      10

**66** People sometimes describe themselves as belonging to the working class, the middle class, or the upper or lower class. Would you describe yourself as belonging to the

- Upper class
- Upper middle class
- Lower middle class
- Working class
- Lower class

**67** Below is an income scale on which 1 indicates the lowest income group and 10 the highest income group in your country. We would like to know in what group your household is.

 Please mark the appropriate number, counting all wages, salaries, pensions and other incomes that come in.

Lowest group Highest group  
1      2      3      4      5      6      7      8      9      10

**68** We have now come to the end of our interview. Thank you very much for your participation! We wish you all the best for your future. May we interview you again in the future?

- Yes  No

**69** Would you like to be contacted in case of job offers, based on the qualifications and professional experience you provided?

- Yes  No

**70** Could you please give us your email address, Facebook address, other social network account name, telephone number (for Telegram, Whatsapp or Signal) or your name so that we can contact you?

Your contact details \_\_\_\_\_

We will ensure that your answers are only accessed by authorized and verified researchers for scientific purposes.

If you have any questions about the survey or would like further information, you can contact us at [+43-\(0\)1-31336-4847](tel:+3801313364847) or by emailing [survey@ukraia.at](mailto:survey@ukraia.at).

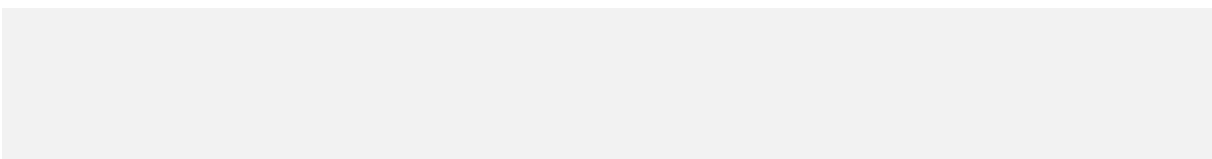

## NACE-Codes

- A** Agriculture, forestry and fishing
- B** Mining and quarrying
- C** Manufacturing
- D** Electricity, gas, steam and air conditioning supply
- E** Water supply; sewerage; waste management and remediation activities
- F** Construction
- G** Wholesale and retail trade; repair of motor vehicles and motorcycles
- H** Transporting and storage
- I** Accommodation and food service activities
- J** Information and communication
- K** Financial and insurance activities
- L** Real estate activities
- M** Professional, scientific and technical activities
- N** Administrative and support service activities
- O** Public administration and defense; compulsory social security
- P** Education
- Q** Human health and social work activities
- R** Arts, entertainment and recreation
- S** Other services activities
- T** Activities of households as employers; undifferentiated goods - and services - producing activities of households for own use
- U** Activities of extraterritorial organizations and bodies

## ISCO-Codes

- 0 Armed forces occupations**
- 1 Managers**
  - 11 Chief executives, senior officials and legislators
  - 12 Administrative and commercial managers
  - 13 Production and specialized services managers
  - 14 Hospitality, retail and other services managers
- 2 Professionals**
  - 21 Science and engineering professionals
  - 22 Health professionals
  - 23 Teaching professionals
  - 24 Business and administration professionals
  - 25 Information and communications technology professionals
  - 26 Legal, social and cultural professionals
- 3 Technicians and associate professionals**
  - 31 Science and engineering associate professionals
  - 32 Health associate professionals
  - 33 Business and administration associate professionals
  - 34 Legal, social, cultural and related associate professionals
  - 35 Information and communications technicians
- 4 Clerical support workers**
  - 41 General and keyboard clerks
  - 42 Customer services clerks
  - 43 Numerical and material recording clerks
  - 44 Other clerical support workers
- 5 Service and sales workers**
  - 51 Personal service workers
  - 52 Sales workers
  - 53 Personal care workers
  - 54 Protective services workers
- 6 Skilled agricultural, forestry and fishery workers**
  - 61 Market-oriented skilled agricultural workers
  - 62 Market-oriented skilled forestry, fishery and hunting workers
  - 63 Subsistence farmers, fishers, hunters and gatherers
- 7 Craft and related trades workers**
  - 71 Building and related trades workers, excluding electricians
  - 72 Metal, machinery and related trades workers
  - 73 Handicraft and printing workers
  - 74 Electrical and electronics trades workers
  - 75 Food processing, wood working, garment and other craft and related trades workers
- 8 Plant and machine operators, and assemblers**
  - 81 Stationary plant and machine operators
  - 82 Assemblers
  - 83 Drivers and mobile plant operators
- 9 Elementary occupations**
  - 91 Cleaners and helpers
  - 92 Agricultural, forestry and fishery laborers
  - 93 Laborers in mining, construction, manufacturing and transport
  - 94 Food preparation assistants
  - 95 Street and related sales and service workers
  - 96 Refuse workers and other elementary workers
